# Supplementary material
Source: PubMed Central journal article supplement (PMC3985384)
Supplement: NIHMS560589-supplement-01.pdf [file NIHMS560589-supplement-01.pdf]

**Supplementary Table 1. BAFF levels and B cell numbers according to total peripheral blood cell donor chimerism percentage at 1 and 3 months post HSCT – RIC patients only.**

|       | D30 chimerism $\geq 80$ |        |                  |                  | D30 chimerism $< 80$ |        |                  |                  | p-value |
|-------|-------------------------|--------|------------------|------------------|----------------------|--------|------------------|------------------|---------|
|       | N                       | Median | 25 <sup>th</sup> | 75 <sup>th</sup> | N                    | Median | 25 <sup>th</sup> | 75 <sup>th</sup> |         |
| BAFF  | 123                     | 11.42  | 6.86             | 16.37            | 15                   | 12.94  | 8.21             | 20.49            | 0.57    |
| Bcell | 116                     | 3.52   | 0.57             | 10.11            | 17                   | 1.87   | 1.33             | 8.96             | 0.82    |

|        | D100 chimerism $\geq 80$ |        |                  |                  | D100 chimerism $< 80$ |        |                  |                  | p-value |
|--------|--------------------------|--------|------------------|------------------|-----------------------|--------|------------------|------------------|---------|
|        | N                        | Median | 25 <sup>th</sup> | 75 <sup>th</sup> | N                     | Median | 25 <sup>th</sup> | 75 <sup>th</sup> |         |
| BAFF   | 115                      | 7.88   | 5.3              | 12.46            | 22                    | 6.58   | 3.24             | 17.7             | 0.63    |
| B cell | 94                       | 18.01  | 5.29             | 46               | 19                    | 7.98   | 6.8              | 73.61            | 0.83    |

**25<sup>th</sup>: 25<sup>th</sup> percentile; 75<sup>th</sup>: 75<sup>th</sup> percentile**
